# Supplementary material for: ‘To be on the safe side’: a qualitative study regarding users’ beliefs and experiences of internet-based self-sampling for Chlamydia trachomatis and Neisseria gonorrhoeae testing
Source: PubMed Central journal article supplement — BMJ Open. 2020 Dec 29;10(12):e041340. doi: 10.1136/bmjopen-2020-041340 (PMC7778762; doi:10.1136/bmjopen-2020-041340), 2020-12-29
Supplement: bmjopen-2020-041340supp001.pdf [file bmjopen-2020-041340supp001.pdf]

## Consolidated criteria for reporting qualitative studies (COREQ): 32-item checklist

Developed from:

Tong A, Sainsbury P, Craig J. Consolidated criteria for reporting qualitative research (COREQ): a 32-item checklist for interviews and focus groups. *International Journal for Quality in Health Care*. 2007. Volume 19, Number 6: pp. 349 – 357

| No. Item                                       | Guide questions/description                                                                                                                              | Reported on Page #                                                |
|------------------------------------------------|----------------------------------------------------------------------------------------------------------------------------------------------------------|-------------------------------------------------------------------|
| <b>Domain 1: Research team and reflexivity</b> |                                                                                                                                                          | Section                                                           |
| <i>Personal Characteristics</i>                |                                                                                                                                                          |                                                                   |
| 1. Interviewer/facilitator                     | Which author/s conducted the interview or focus group?                                                                                                   | Methods, Sample and procedure                                     |
| 2. Credentials                                 | What were the researcher's credentials? E.g. PhD, MD                                                                                                     | Methods, Sample and procedure                                     |
| 3. Occupation                                  | What was their occupation at the time of the study?                                                                                                      | Methods, Sample and procedure                                     |
| 4. Gender                                      | Was the researcher male or female?                                                                                                                       |                                                                   |
| 5. Experience and training                     | What experience or training did the researcher have?                                                                                                     | Methods, Sample and procedure                                     |
| <i>Relationship with participants</i>          |                                                                                                                                                          |                                                                   |
| 6. Relationship established                    | Was a relationship established prior to study commencement?                                                                                              | No                                                                |
| 7. Participant knowledge of the interviewer    | What did the participants know about the researcher? e.g. personal goals, reasons for doing the research                                                 | Ethical considerations                                            |
| 8. Interviewer characteristics                 | What characteristics were reported about the interviewer/facilitator? e.g. Bias, assumptions, reasons and interests in the research topic                | Methods<br>Ethical considerations                                 |
| <b>Domain 2: study design</b>                  |                                                                                                                                                          |                                                                   |
| <i>Theoretical framework</i>                   |                                                                                                                                                          |                                                                   |
| 9. Methodological orientation and Theory       | What methodological orientation was stated to underpin the study? e.g. grounded theory, discourse analysis, ethnography, phenomenology, content analysis | Methods,<br>Theoretical framework – the Health Belief Model (HBM) |
| <i>Participant selection</i>                   |                                                                                                                                                          |                                                                   |
| 10. Sampling                                   | How were participants selected? e.g. purposive, convenience, consecutive, snowball                                                                       | Methods                                                           |
| 11. Method of approach                         | How were participants approached? e.g. face-to-face, telephone, mail, email                                                                              | Methods                                                           |
| 12. Sample size                                | How many participants were in the study?                                                                                                                 | Methods                                                           |

|                                        |                                                                                   |                                                                                                                                             |
|----------------------------------------|-----------------------------------------------------------------------------------|---------------------------------------------------------------------------------------------------------------------------------------------|
| 13. Non-participation                  | How many people refused to participate or dropped out? Reasons?                   | Methods                                                                                                                                     |
| <i>Setting</i>                         |                                                                                   |                                                                                                                                             |
| 14. Setting of data collection         | Where was the data collected? e.g. home, clinic, workplace                        | Methods                                                                                                                                     |
| 15. Presence of non-participants       | Was anyone else present besides the participants and researchers?                 | Methods                                                                                                                                     |
| 16. Description of sample              | What are the important characteristics of the sample? e.g. demographic data, date | Results                                                                                                                                     |
| <i>Data collection</i>                 |                                                                                   |                                                                                                                                             |
| 17. Interview guide                    | Were questions, prompts, guides provided by the authors? Was it pilot tested?     | Methods and Table 1                                                                                                                         |
| 18. Repeat interviews                  | Were repeat interviews carried out? If yes, how many?                             | Methods                                                                                                                                     |
| 19. Audio/visual recording             | Did the research use audio or visual recording to collect the data?               | Methods page                                                                                                                                |
| 20. Field notes                        | Were field notes made during and/or after the interview or focus group?           | Methods<br>The interviewer made a summary of what was said in the end of the interview and also made some field notes after each interview. |
| 21. Duration                           | What was the duration of the interviews or focus group?                           | Methods                                                                                                                                     |
| 22. Data saturation                    | Was data saturation discussed?                                                    | Yes, see Methods                                                                                                                            |
| 23. Transcripts returned               | Were transcripts returned to participants for comment and/or correction?          | No, see Methods                                                                                                                             |
| <b>Domain 3: analysis and findings</b> |                                                                                   |                                                                                                                                             |
| <i>Data analysis</i>                   |                                                                                   |                                                                                                                                             |
| 24. Number of data coders              | How many data coders coded the data?                                              | Two authors (MG and ML), see Methods                                                                                                        |
| 25. Description of the coding tree     | Did authors provide a description of the coding tree?                             | Figure 1                                                                                                                                    |
| 26. Derivation of themes               | Were themes identified in advance or derived from the data?                       | Yes, we used a deductive approach, see Methods                                                                                              |
| 27. Software                           | What software, if applicable, was used to manage the data?                        | We did not use a software such as NVivo in the present study                                                                                |
| 28. Participant checking               | Did participants provide feedback on the findings?                                | No, see Methods                                                                                                                             |
| <i>Reporting</i>                       |                                                                                   |                                                                                                                                             |
| 29. Quotations presented               | Were participant quotations presented to                                          | Yes, see Results                                                                                                                            |

|                                  |                                                                                        |                                                                                                                                                                            |
|----------------------------------|----------------------------------------------------------------------------------------|----------------------------------------------------------------------------------------------------------------------------------------------------------------------------|
|                                  | illustrate the themes/findings? Was each quotation identified? e.g. participant number |                                                                                                                                                                            |
| 30. Data and findings consistent | Was there consistency between the data presented and the findings?                     | Yes, see Results                                                                                                                                                           |
| 31. Clarity of major themes      | Were major themes clearly presented in the findings?                                   | Yes, see Results and Figure 1.                                                                                                                                             |
| 32. Clarity of minor themes      | Is there a description of diverse cases or discussion of minor themes?                 | Yes, diverse views among the participants are presented in the Results. The authors have suggested a modification of the model to include modified behaviour. See results. |
